# Supplementary material for: The synergistic inhibitory effect of PRKAA1 activation on ECM mechanical stress-induced skin fibrosis
Source: Research Square preprint supplement (doi:10.21203/rs.3.rs-8422435/v1), 2026-01-29
Supplement: Supplementary file 1 [file 9f301fd7b88b65ee1f6a215d.docx]

**Supplementary Information**

**The synergistic inhibitory effect of PRKAA1 activation on ECM mechanical stress-induced skin fibrosis**

**Running title: Synergistic inhibition of skin fibrosis by PRKAA1**

Yang Xiang1,3#, Yuanyuan Chen2#, Jin Zhang1#, Bohan Pan1, Jianyu Lu1, Chenru Wei1, Jiqiu Chen1, Chan Li1, Shizhao Ji1*, Yanyong Yang2*, Shihui Zhu1,3*

**#. These authors contributed equally to this work.**

1 Department of Burns of Changhai Hospital, Department of Emergency of Changhai Hospital, Naval Medical University, Shanghai 200433, China

2 Department of Radiation Medicine, Faculty of Naval Medicine, Naval Medical University, Shanghai, 200433, China.

3 Department of Burns and Plastic Surgery, Shanghai Children’s Medical Center, School of Medicine, Shanghai Jiao Tong University, Shanghai, 200127, China.

**Supplementary figures and tables**


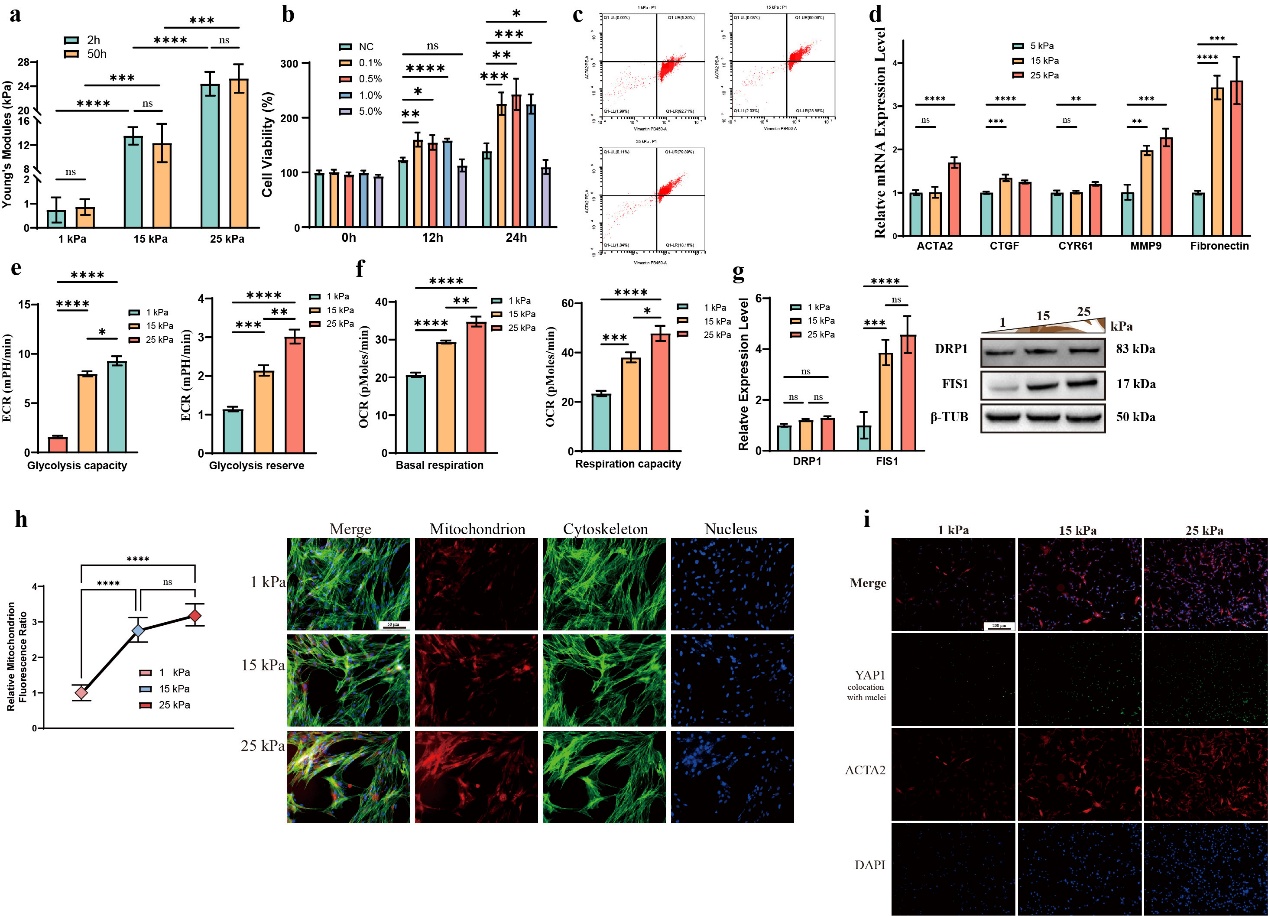


**Extended Data Figure 1 Mechanical modulus induces HDF differentiation and metabolic reprogramming.**

a. Statistical graph of Young’s modulus of GelMA hydrogels (n=8).

b. Biocompatibility evaluation of GelMA precursor solution on HDFs using CCK-8 assay (n=6).

c. Flow cytometry scatter plots of *VIM*⁺*ACTA2*⁺ HDFs under 1, 15, and 25 kPa mechanical stimulation.

d. Relative mRNA expression levels of *ACTA2*, *CTGF*, *CYR61*, *MMP9*, and *FN1* in HDFs under 1, 15, and 25 kPa mechanical stimulation (n=6).

e. Glycolytic capacity and remaining glycolytic activity in HDFs under 1, 15, and 25 kPa mechanical stimulation (n=6).

f. Basal respiration capacity and remaining respiratory activity in HDFs under 1, 15, and 25 kPa mechanical stimulation (n=6).

g. Relative expression levels of *DRP1* and *FIS1* and their protein immunoblotting images in HDFs under 1, 15, and 25 kPa mechanical stimulation (n=3).

h. MitoTracker Red CMXRos-labeled mitochondrial immunofluorescence images and relative immunofluorescence intensity of HDFs under 1, 15, and 25 kPa mechanical stimulation (n=3).

i. *ACTA2* and *YAP1* nuclear localization immunofluorescence images and relative immunofluorescence intensity of HDFs under 1, 15, and 25 kPa mechanical stimulation (n=4).

​**Abbreviations**: GelMA, Gelatin Methacryloyl; HDF, human dermal fibroblast; *VIM*, vimentin; *ACTA2*, Actin Alpha 2, Smooth Muscle; *CTGF*, connective tissue growth factor; *CYR61*, cysteine-rich angiogenic inducer 61; *MMP9*, matrix metallopeptidase 9; *FN1*, Fibronectin 1; *YAP1*, Yes1 Associated Transcriptional Regulator; *DRP1*, Dynamin-Related Protein 1; *FIS1*, Mitochondrial Fission 1; *β-TUB*, β-Tubulin. ​**Statistical notation**: Horizontal lines indicate comparisons between two groups; ns, non-significant; *，*P* < 0.05；**，*P* < 0.01；***，*P* < 0.001；****，*P* < 0.0001.


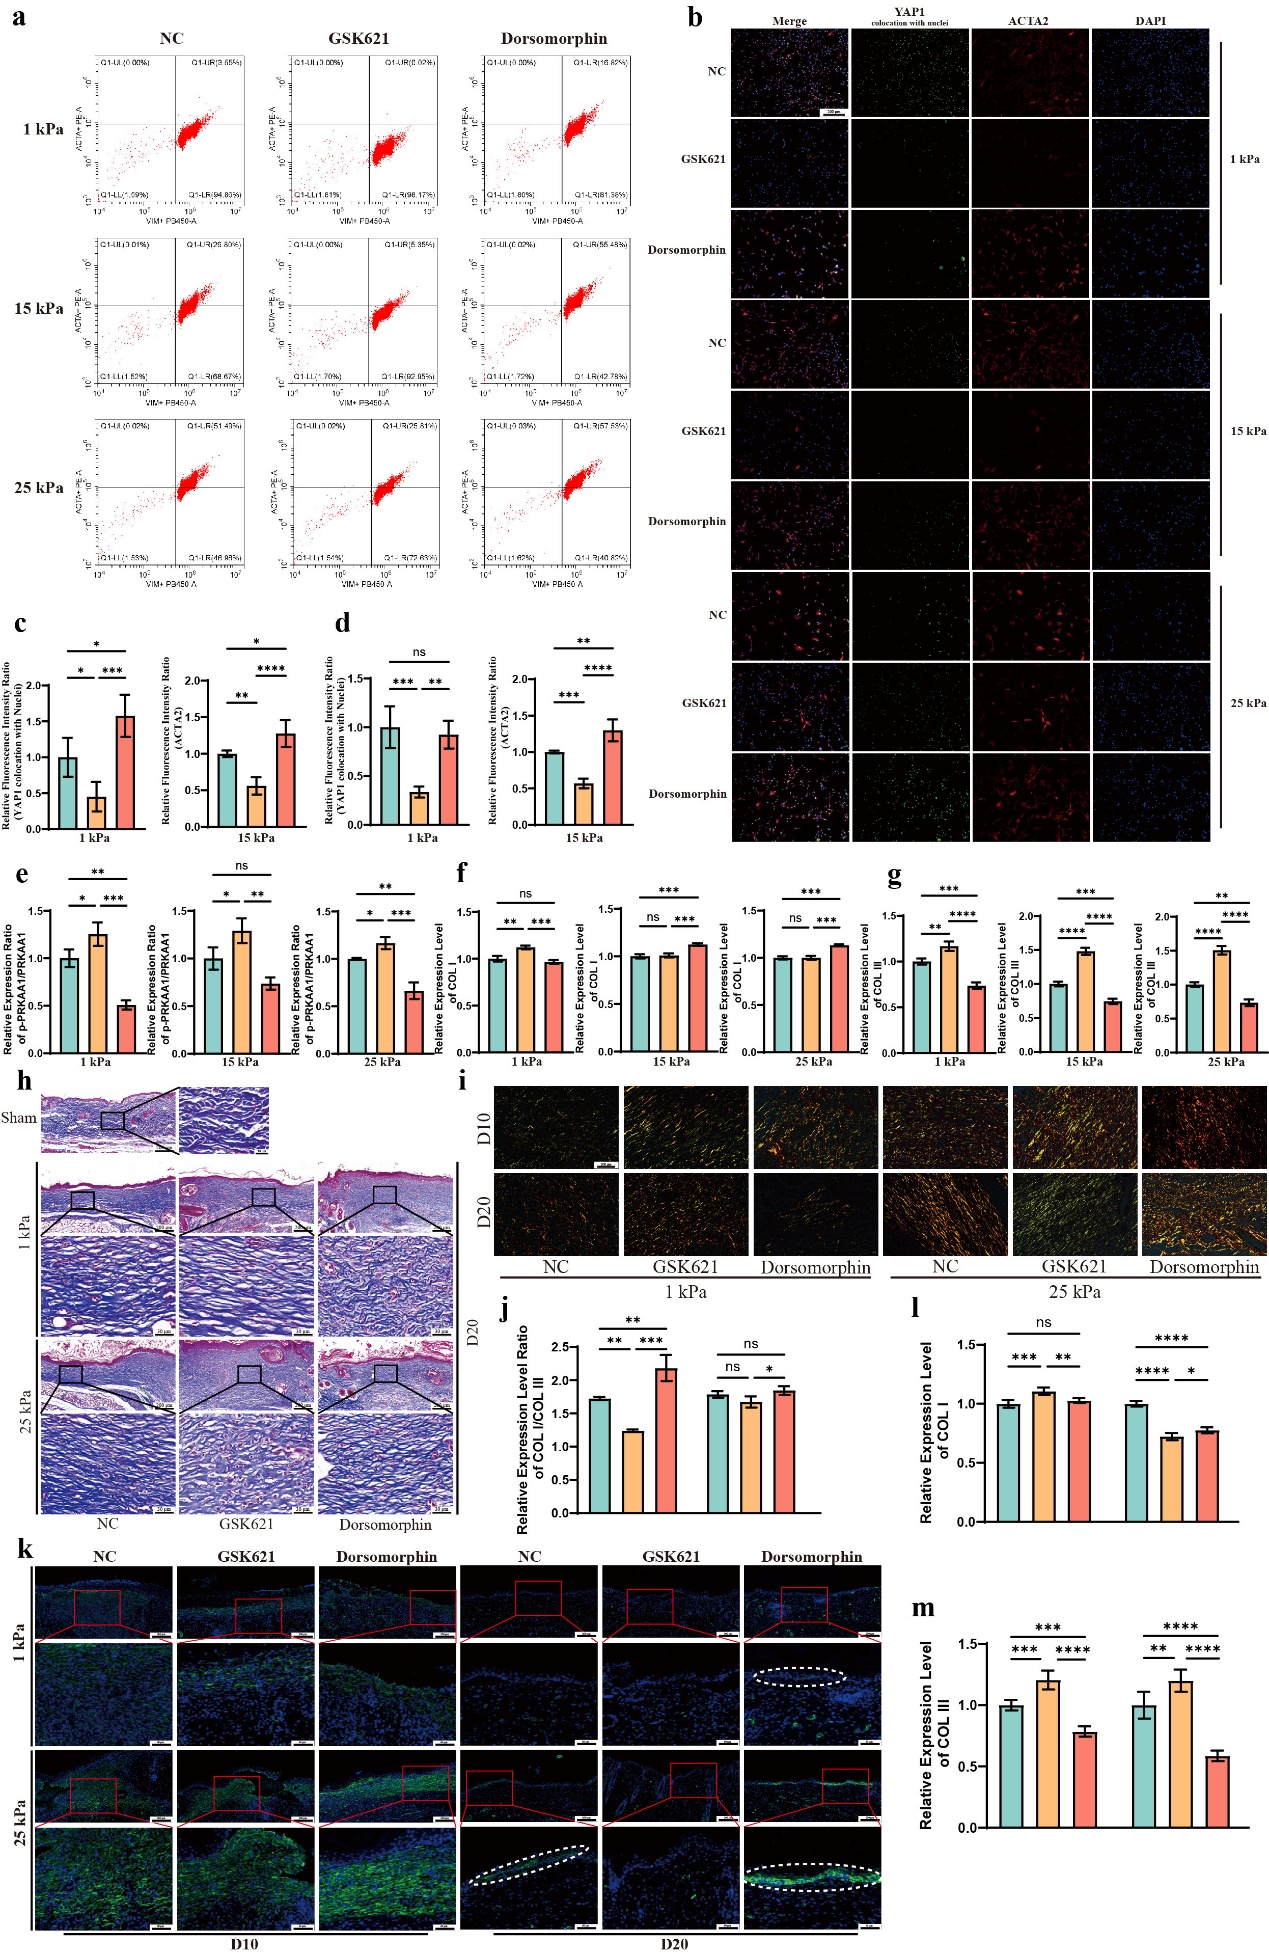
**Extended Data Figure 2 *PRKAA1* activation inhibits mechanical modulus-induced HDF differentiation and fibrosis.**

a. Flow cytometry scatter plots of *VIM*⁺*ACTA2*⁺ HDFs under GSK621 or Dorsomorphin treatment and 1 or 15 kPa mechanical stimulation.

b-d. Immunofluorescence images and relative immunofluorescence intensity of *ACTA2* and *YAP1* nuclear localization in HDFs under GSK621 or Dorsomorphin treatment and 1 or 15 kPa mechanical stimulation (n=4).

e-g. Western blotting images of relative *PRKAA1* phosphorylation level, and relative expression levels of *COL I* and *COL III* in HDFs under GSK621 or Dorsomorphin treatment and different mechanical stimuli (n=3).

h. Masson staining images of mouse dorsal full-thickness defect wounds at day 20 under GSK621 or Dorsomorphin treatment and 1 or 25 kPa mechanical stress intervention.

i. Sirius Red staining images of mouse dorsal full-thickness defect wounds at day 10 or 20 under GSK621 or Dorsomorphin treatment and 1 or 25 kPa mechanical stress intervention.

j. Differences in *Col I*/*Col III* ratio among different mechanical stimuli at day 10, quantified by Sirius Red staining (n=3).

k. Immunofluorescence staining images of *Acta2* in wounds at day 10 and 20 under 1 or 25 kPa mechanical stimulation and drug intervention. l-m. Relative expression levels of *Col I* and *Col III* in wound tissue at day 20 under differential mechanical stimulation and drug intervention, quantified by Western blotting (n=5). ​**Abbreviations**: HDF, human dermal fibroblast; *VIM*, vimentin; *ACTA2*, Actin Alpha 2, Smooth Muscle; *PRKAA1*, *AMPKα1*, Protein Kinase AMP-Activated Catalytic Subunit Alpha 1; *YAP1*, Yes1 Associated Transcriptional Regulator; *COL I*, collagen type I; *COL III*, collagen type III; Dorsomorphin, a BMP signaling inhibitor. ​**Statistical notation**: Horizontal lines indicate comparisons between two groups; ns, non-significant; *，*P* < 0.05；**，*P* < 0.01；***，*P* < 0.001；****，*P* < 0.0001.


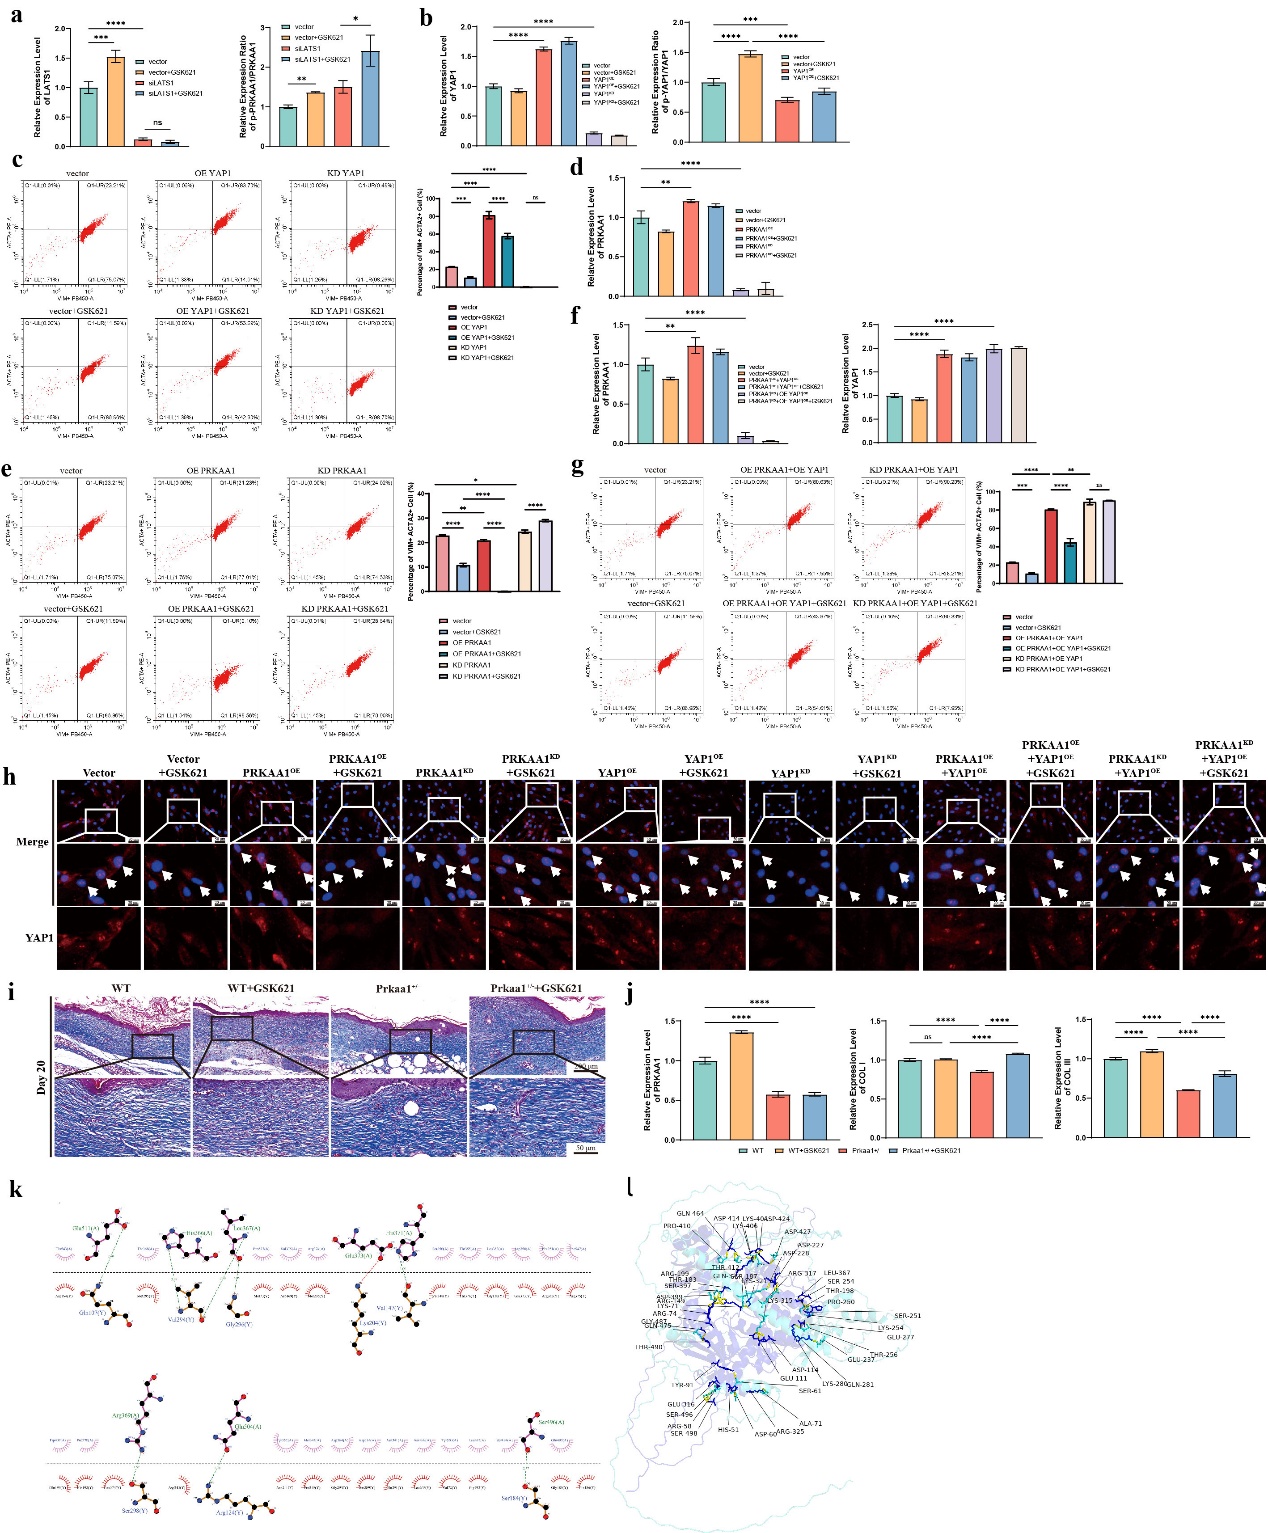


**Extended Data Figure 3. *PRKAA1* activation inhibits mechanical modulus-induced fibrosis by suppressing *YAP1* activity.**

a. Western blotting images of relative *LATS1* expression levels and *PRKAA1* phosphorylation levels in cells treated with GSK621 under 25 kPa mechanical stimulation and *LATS1* knockdown (*LATS1KD*) (n=3).

b. Western blotting images of relative *YAP1* expression and phosphorylation levels in *YAP1*-overexpressing (*YAP1OE*) or *YAP1*-knockdown (*YAP1KD*) cells after GSK621 treatment (n=3).

c. Flow cytometry scatter plots and statistical graphs of *VIM*⁺*ACTA2*⁺ HDFs in *YAP1OE* or *YAP1KD* cells after GSK621 treatment (n=3).

d. Western blotting images of relative *PRKAA1* expression levels in *PRKAA1OE* or *PRKAA1KD* cells after GSK621 intervention (n=3).

e. Flow cytometry scatter plots and statistical graphs of *VIM*⁺*ACTA2*⁺ HDFs in *PRKAA1OE* or *PRKAA1KD* cells after GSK621 intervention (n=3).

f. Western blotting images of relative *PRKAA1* and *YAP1* expression levels in *PRKAA1OEYAP1OE* or *PRKAA1KDYAP1OE* cells after GSK621 treatment (n=3).

g. Flow cytometry scatter plots and statistical graphs of *VIM*⁺*ACTA2⁺* HDFs in *PRKAA1OEYAP1OE* or *PRKAA1KDYAP1OE* cells after GSK621 treatment (n=3).

h. Immunofluorescence images of *YAP1* nuclear localization in WT, WT+GSK621, *YAP1OE*, *YAP1OE*+GSK621, *YAP1KD*, *YAP1KD*+GSK621, *PRKAA1OEYAP1OE*, *PRKAA1OEYAP1OE*+GSK621, *PRKAA1KDYAP1OE*, *PRKAA1KDYAP1OE*+GSK621, *PRKAA1OE*, *PRKAA1OE*+GSK621, *PRKAA1KD*, and *PRKAA1KD*+GSK621 cells.

i. Masson staining images of mouse dorsal full-thickness defect wounds at day 20 under PBS or GSK621 treatment and 25 kPa mechanical stress: WT vs. *Prkaa1+/-* mice (n=3).

j. Western blotting images of relative *Prkaa1*, *Col I*, and *Col III* expression levels in wound tissue at day 20 under PBS or GSK621 treatment and 25 kPa mechanical stress: WT vs. *Prkaa1+/-* mice (n=5).

k. 2D interaction map of *PRKAA1*-*YAP1* predicted by Rosetta software. l. 3D visualization of *PRKAA1*-*YAP1* interaction sites predicted by AlphaFold3 and modeled with PyMol. ​

**Abbreviations**: HDF, human dermal fibroblast; *VIM*, vimentin; *LATS1*, Large Tumor Suppressor Kinase 1; *ACTA2*, Actin Alpha 2, Smooth Muscle; OE, over-expression; KD, knockdown; *PRKAA1*, *AMPKα1*, Protein Kinase AMP-Activated Catalytic Subunit Alpha 1; *YAP1*, Yes1 Associated Transcriptional Regulator; *COL I*, collagen type I; *COL III*, collagen type III; WT, wild type; *Prkaa1+/-*, Prkaa1 heterozygous. ​**Statistical notation**: Horizontal lines indicate comparisons between two groups; ns, non-significant; *，*P* < 0.05；**，*P* < 0.01；***，*P* < 0.001；****，*P* < 0.0001.

Table S1 Sequences of siRNAs and shRNAs and used in this study

| Type | Target | Sequence |
| --- | --- | --- |
| siRNA | *LATS1* | F1: GGAGUACUUCAGAAGUUAATT  R1: UUAACUUCUGAAGUACUCCTT  F2: AGUCAGAAAUCCACCCAAATT  R2: UUUGGGUGGAUUUCUGACUTT  F3: GCCGGCAAAUGUUACAAGATT  R3: UCUUGUAACAUUUGCCGGCTT |
| shRNA | *PRKAA1* | RNAi1:  CCGGCATAAAGTAGCTGTGAAGATACTCGAGTATCTTCACAGCTACTTTATGTTTTTG  RNAi2:  CCGGGAATGCAAAGATAGCTGATTTCTCGAGAAATCAGCTATCTTTGCATTCTTTTTG  RNAi3:  CCGGGTGGATTATTGTCACAGGCATCTCGAGATGCCTGTGACAATAATCCACTTTTTG |
| shRNA | *YAP1* | RNAi1:  CCGGGCCACCAAGCTAGATAAAGAACTCGAGTTCTTTATCTAGCTTGGTGGCTTTTTG  RNAi2: CCGGCAGGTGATACTATCAACCAAACTCGAGTTTGGTTGATAGTATCACCTGTTTTTG  RNAi3:  CCGGGAGCTCATTCCTCTCCAGCTTCTCGAGAAGCTGGAGAGGAATGAGCTCTTTTTG |

Table S2 Oligonucleotide primers for qRT-PCR analyses

| Type | Target | Sequence |
| --- | --- | --- |
| mRNA | *ACTA2* | F: CTATGAGGGCTATGCCTTGCC  R: GCTCAGCAGTAGTAACGAAGGA |
| mRNA | *CTGF* | F: AAAAGTGCATCCGTACTCCCA  R: CCGTCGGTACATACTCCACAG |
| mRNA | *CYR61* | F: GGTCAAAGTTACCGGGCAGT  R: GGAGGCATCGAATCCCAGC |
| mRNA | *MMP9* | F: GGGACGCAGACATCGTCATC  R: TCGTCATCGTCGAAATGGGC |
| mRNA | *FN1* | F: CGGTGGCTGTCAGTCAAAG  R: AAACCTCGGCTTCCTCCATAA |
| mRNA | *β-TUBULIN* | F: TGGACTCTGTTCGCTCAGGT  R: TGCCTCCTTCCGTACCACAT |
| TEAD1-binding | *CTGF* | F: GCCAAGTTGCCTTTAATACACA  R: AAGCTCAGGAAGAATTTTCGT |
| TEAD1-binding | *CYR61* | F: GCCATATTCAACATCTGCACAC  R: TTAGTGACTCCCCACACATCT |

Table S3 Antibodies used in this studty

| Anbiodies | Source | Identifier |
| --- | --- | --- |
| Anti-*AMPK alpha 1* antibody | Abcam | ab32047 |
| Anti-*AMPK alpha 1* (phospho S487) antibody | Abcam | ab131357 |
| Anti-*YAP1* antibody | Abcam | ab52771 |
| Anti-*YAP1* (phospho S127) antibody | Abcam | ab76252 |
| Anti-Phospho - (Ser/Thr) Phe antibody | Abcam | ab17464 |
| Anti-*Collagen I* antibody | Abcam | ab316222 |
| Anti-*Collagen III* antibody | Abcam | ab7778 |
| Anti-*Vimentin* antibody | Abcam | ab8069 |
| Anti-*TEF1*/*TEAD1* antibody | Abcam | ab133533 |
| α-Smooth Muscle Actin Rabbit mAb | CST | #19245 |
| Anti-*beta Tubulin* Rabbit mAb | Engibody | AT0011 |
| Hexokinase 2 Polyclonal antibody | Proteintech | 22029-1-AP |
| *LDHA*-Specific Polyclonal antibody | Proteintech | 19987-1-AP |
| *MTCO2* Polyclonal antibody | Proteintech | 55070-1-AP |
| *ATP5A1* monoclonal antibody | Proteintech | 82288-1-RR |
| *DRP1* (C-terminal) Polyclonal antibody | Proteintech | 12957-1-AP |
| *FIS1* Polyclonal antibody | Proteintech | 10956-1-AP |
| Flag Tag Rabbit Monoclonal Antibody | Beyotime | AG8050 |
| GST Tag Rabbit Monoclonal Antibody | Beyotime | AG8054 |
| FITC Phalloidin | Solarbio | CA1620 |
| Goat anti-rabbit IgG Alexa Fluor 488 | ThermoScientific | A-11008 |
| Goat anti-mouse IgG Alexa Fluor 488 | ThermoScientific | A-11001 |
| Goat anti-rabbit IgG Alexa Fluor 594 | ThermoScientific | A 11012 |
| Goat anti-mouse IgG Alexa Fluor 594 | ThermoScientific | A-11005 |
| Secondary Antibody, PE | ThermoScientific | 12-4739-81 |
| Secondary Antibody, eFluor™ 450 | ThermoScientific | 48-4015-82 |
